# Supplementary material for: Development of a Nomogram for Predicting Asymptomatic Coronary Artery Disease in Patients with Ischemic Stroke
Source: PubMed Central journal article supplement (PMC9900699; doi:10.2174/1574887117666220513104303), 2022-11-25
Supplement: CNR-19-188_SD1.pdf [file CNR-19-188_SD1.pdf]

## Supplementary Material

### Development of a Nomogram for Predicting Asymptomatic Coronary Artery Disease in Patients with Ischemic Stroke

Jie Yang<sup>1,2</sup>, Xinguang Yang<sup>1,2</sup>, Jun Wen<sup>3</sup>, Jiayi Huang<sup>1,2,4</sup>, Lihong Jiang<sup>1,2</sup>, Sha Liao<sup>1,2</sup>, Chun Lian<sup>1,2</sup>, Haiyan Yao<sup>1,2</sup>, Li Huang<sup>1,2</sup>, Youming Long<sup>1,2,\*</sup>.

<sup>1</sup>Department of Neurology, The Second Affiliated Hospital of GuangZhou Medical University, 250# Changgang East Road, GuangZhou, 510260, Guangdong Province, China; <sup>2</sup>Key Laboratory of Neurogenetics and Channelopathies of Guangdong Province and The Ministry of Education of China, Institute of Neuroscience and the Second Affiliated Hospital of GuangZhou Medical University, 250# Changgang east Road, GuangZhou, 510260, Guangdong Province, China; <sup>3</sup>Department of Neurology, Jiangmen Central Hospital, 23# Haibang street, North Street, Jiangmen, 529000, Guangdong Province, China; <sup>4</sup>Department of Neurology, Dongguan Dongcheng Hospital, 56# Nancheng Road, DongGuan, 523000, Guangdong Province, China

Supplementary Table 1

#### Stepwise regression model for variables selection.

| Variable                            | Estimate | Std Error | z-value | p-value | AIC   |
|-------------------------------------|----------|-----------|---------|---------|-------|
| (Intercept)                         | -3.91    | 1.378     | -2.837  | 0.005   | 322.2 |
| Male                                | 0.682    | 0.366     | 1.861   | 0.063   |       |
| Age                                 | 0.029    | 0.015     | 1.885   | 0.059   |       |
| Hypertension                        | 1.07     | 0.404     | 2.647   | 0.008   |       |
| Blood glucose level                 | 0.134    | 0.059     | 2.251   | 0.024   |       |
| HDL-C                               | -1.146   | 0.653     | -1.756  | 0.079   |       |
| Presence of CVA $\geq$ 50% stenosis | 0.513    | 0.286     | 1.795   | 0.073   |       |

HDL-C, high-density lipoprotein cholesterol; CVA, cervicocephalic artery; AIC, Akaike Information Criterion.
